# Supplementary material
Source: Springer Nature journal article supplement (https://www.springermedizin.de/resource/supplementary/12885_2013_5010_MOESM1_ESM.pdf/9468064)

**A**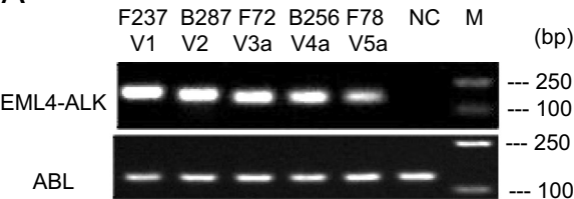**B****EML4-ALK fusion variants**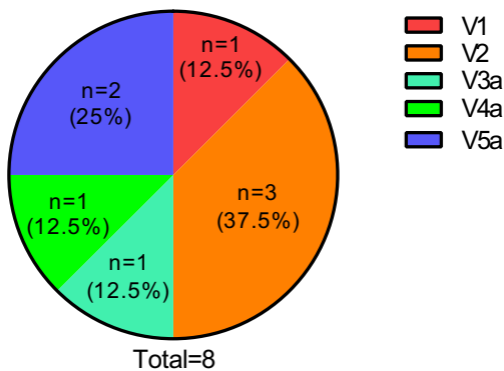**C**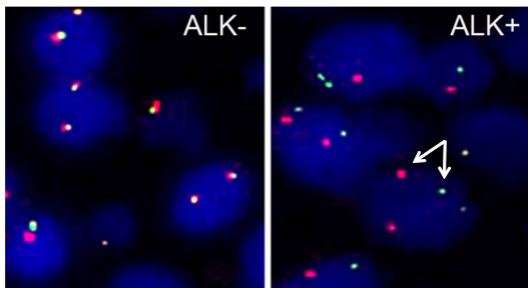

Supplement: MOESM1 [file 9468064]
